# Supplementary material for: A simple route to thermally-stable salts of pyrrolidinium-2-carbonylchloride
Source: Royal Society of Chemistry journal article supplement (doi:10.1039/c4ra12630k), 2014-11-13

# **A Simple Route to Thermally-Stable Salts of Pyrrolidinium-2-Carbonylchloride**

*Fabio Marchetti, Guido Pampaloni, Stefano Zacchini*

## **Supporting Information**

**Figure S1.** IR spectrum (solid state) of **2a**.

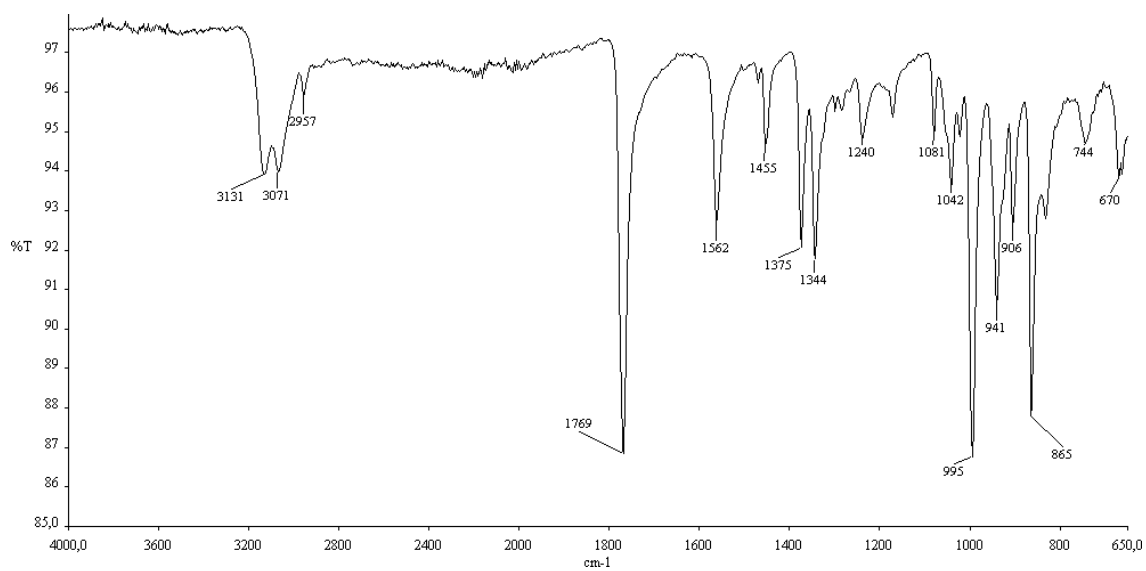

**Figure S2.** IR spectrum (solid state) of **2b**.

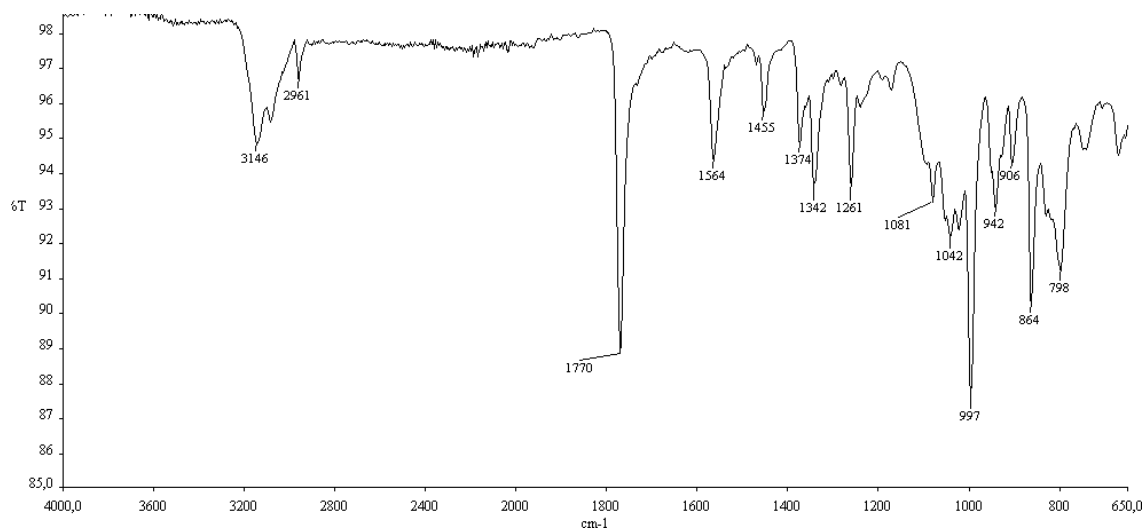

**Figure S3.**  $^1\text{H}$  NMR spectrum ( $\text{CD}_3\text{CN}$ ) of **2a**.

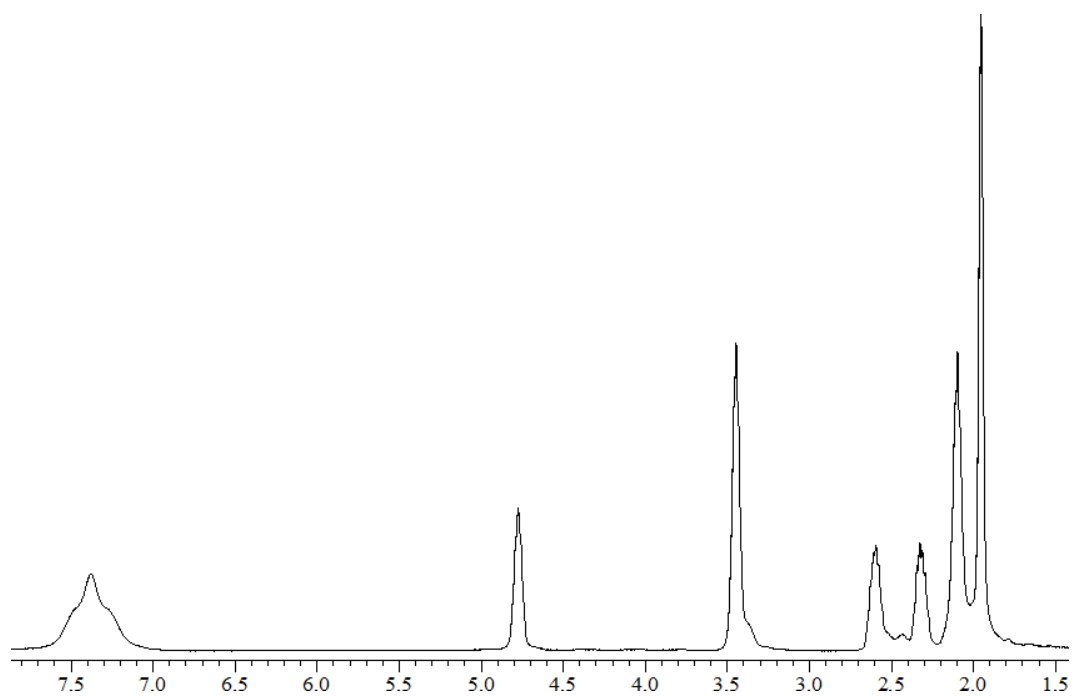

**Figure S4.**  $^1\text{H}$  NMR spectrum ( $\text{CD}_3\text{CN}$ ) of **2b**.

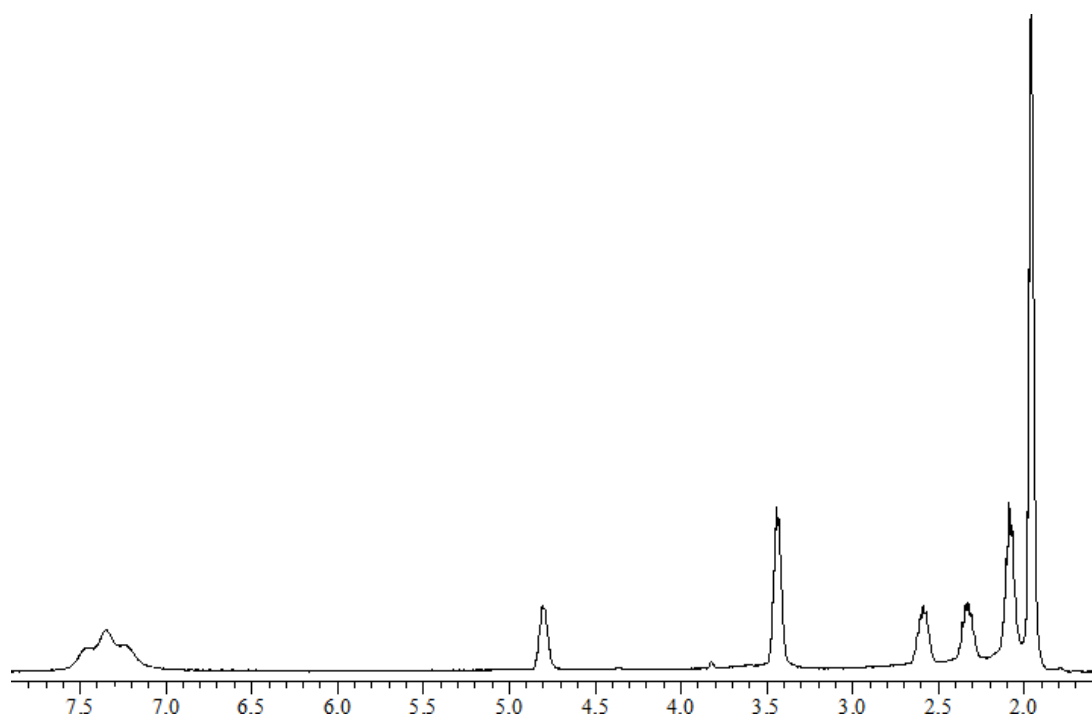

**Figure S5.**  $^{13}\text{C}$  NMR spectrum ( $\text{CD}_3\text{CN}$ ) of **2a**.

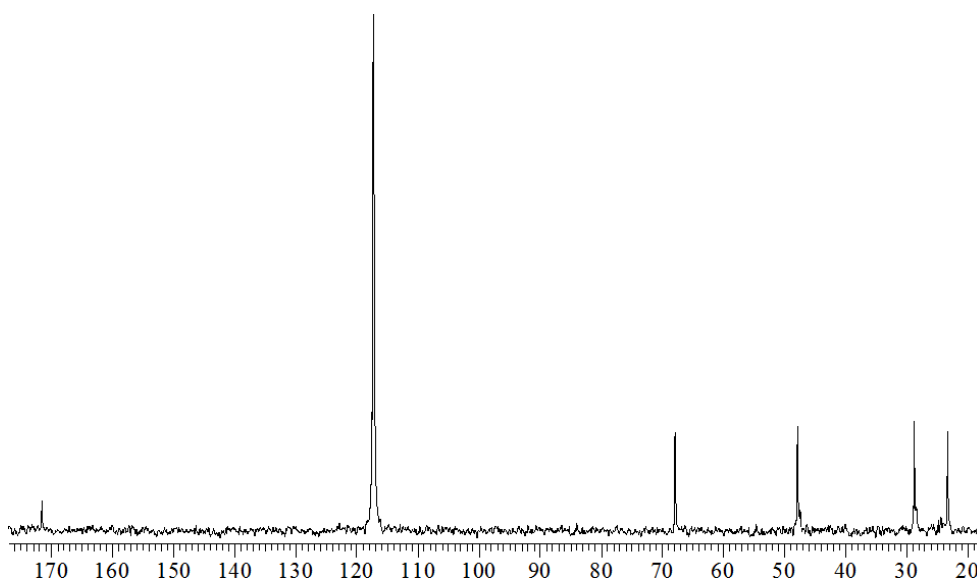

**Figure S6.**  $^{13}\text{C}$  NMR spectrum ( $\text{CD}_3\text{CN}$ ) of **2b**.

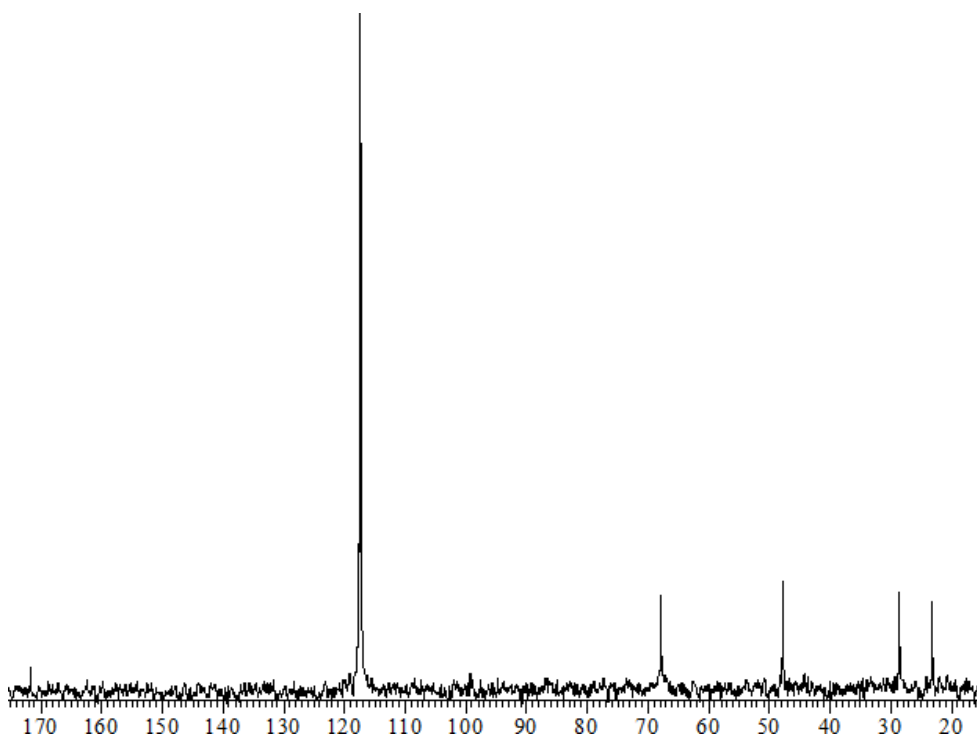

Supplement: c4ra12630k1.pdf [file c4ra12630k1.pdf]
